# Supplementary material for: Фантазия как внеэтическое поле творческой деятельности
Source: Springer Nature journal article supplement (doi:10.1186/s13054-016-1192-x), 2012-01-01
Supplement: MOESM1 [file 9780998]

## ADDITIONAL FILE 1 SUPPLEMENTAL DATA.

### INDEX

|                                                                                                                                       |           |
|---------------------------------------------------------------------------------------------------------------------------------------|-----------|
| <b>SUPPLEMENTAL TEXTS .....</b>                                                                                                       | <b>4</b>  |
| <b>TEXT S1: COMPLETE METHODS .....</b>                                                                                                | <b>4</b>  |
| Sample collection and handling .....                                                                                                  | 4         |
| Blood (serum) .....                                                                                                                   | 4         |
| Urine .....                                                                                                                           | 4         |
| Biomarker measurements .....                                                                                                          | 5         |
| Creatinine .....                                                                                                                      | 5         |
| CHI3L1 .....                                                                                                                          | 5         |
| NGAL .....                                                                                                                            | 6         |
| UO calculation.....                                                                                                                   | 7         |
| Statistical analysis .....                                                                                                            | 7         |
| Review and adjustment of CHI3L1 concentrations before input in statistical programs.....                                              | 8         |
| Step 1: Evaluation of the standard curve of the ELISA .....                                                                           | 8         |
| Step 2: Re-analysis of samples with a concentration (not adjusted for dilution) outside the validated dynamic range of the curve..... | 8         |
| Step 3: Adjustment of CHI3L1 concentrations of optimally diluted samples with $OD_{\text{sample}} < OD_{62.5}$ .....                  | 8         |
| Adjustment of UNGAL concentrations before input in statistical programs.....                                                          | 9         |
| <b>TEXT S2: ADDITIONAL ANALYSES .....</b>                                                                                             | <b>10</b> |
| <b>METHODS .....</b>                                                                                                                  | <b>10</b> |
| Subgroup analyses .....                                                                                                               | 10        |
| Additional AUC-ROC analyses .....                                                                                                     | 10        |
| Validation of the analytical stability of CHI3L1 .....                                                                                | 11        |
| Short-term stability of CHI3L1 in serum and urine before centrifugation.....                                                          | 11        |
| Combined long-term and freeze-thaw stability of CHI3L1 in urine .....                                                                 | 11        |
| Partial in-house validation of the CHI3L1 ELISA .....                                                                                 | 11        |
| Within-run precision or intra-assay variability .....                                                                                 | 11        |
| Between-run precision or inter-assay variability .....                                                                                | 12        |
| Calculation of the LOD and LOQ.....                                                                                                   | 12        |
| Linearity check for urine.....                                                                                                        | 12        |
| <b>RESULTS .....</b>                                                                                                                  | <b>14</b> |
| Biomarkers' diagnostic performances in subgroups.....                                                                                 | 14        |
| Additional diagnostic performances.....                                                                                               | 14        |
| Stability of CHI3L1 in serum and urine .....                                                                                          | 15        |
| Partial in-house validation of the CHI3L1 ELISA .....                                                                                 | 15        |

|                                                                                                                                                                                                                                                                                |                  |
|--------------------------------------------------------------------------------------------------------------------------------------------------------------------------------------------------------------------------------------------------------------------------------|------------------|
| <b>CONCLUSIONS REGARDING THE VALIDATION OF THE ANALYTICAL STABILITY OF CHI3L1 AND THE PARTIAL IN-HOUSE VALIDATION OF THE CHI3L1 ELISA .....</b>                                                                                                                                | <b>17</b>        |
| <b>LIST OF ABBREVIATIONS .....</b>                                                                                                                                                                                                                                             | <b>18</b>        |
| <b>SUPPLEMENTAL REFERENCES .....</b>                                                                                                                                                                                                                                           | <b>19</b>        |
| <b><u>SUPPLEMENTAL TABLES .....</u></b>                                                                                                                                                                                                                                        | <b><u>21</u></b> |
| Table S1 Kidney Disease: Improving Global Outcomes definition and classification of acute kidney injury. <sup>a</sup> .....                                                                                                                                                    | 21               |
| Table S2 Strengthening the Reporting of OBServational studies in Epidemiology statement - checklist of items that should be included in the reports of cohort studies. <sup>a</sup> .....                                                                                      | 22               |
| Table S3A Two representative work schemes for sample centrifugation in weekends.....                                                                                                                                                                                           | 25               |
| Table S3B Dilution of serum and urine samples for the initial measurement of chitinase 3-like protein 1 by enzyme-linked immunosorbent assay.....                                                                                                                              | 26               |
| Table S3C Evaluation of the assured dynamic range of the chitinase 3-like protein 1 enzyme-linked immunosorbent assay standard curve. ....                                                                                                                                     | 27               |
| Table S3D Re-analysis of samples with a concentration (not adjusted for dilution) outside the validated dynamic range of the chitinase 3-like protein 1 enzyme-linked immunosorbent assay standard curve. ....                                                                 | 28               |
| Table S3E Adjustment of chitinase 3-like protein 1 concentrations of optimally diluted samples with optical density <sub>sample</sub> < optical density <sub>62.5</sub> .....                                                                                                  | 29               |
| Table S3F Adjustment of urinary neutrophil gelatinase-associated lipocalin concentrations before input in statistical programs.....                                                                                                                                            | 31               |
| Table S4A Definition of suspected bacterial infection, of arterial hypotension, of organ dysfunction, and of shock. ....                                                                                                                                                       | 32               |
| Table S4B Experimental setup for evaluation of between-run precision or inter-assay variability by the manufacturer.....                                                                                                                                                       | 33               |
| Table S4C Areas under the receiver-operating characteristics curves with 95% confidence interval of urinary chitinase 3-like protein 1 and urinary neutrophil gelatinase-associated lipocalin at enrollment for prediction of the additional endpoints. ....                   | 34               |
| Table S4D Short-term stability of chitinase 3-like protein 1 in serum and urine before centrifugation. ....                                                                                                                                                                    | 35               |
| Table S4E Combined long-term and freeze-thaw stability of chitinase 3-like protein 1 in urine.....                                                                                                                                                                             | 36               |
| Table S4F Within-run precision or intra-assay variability of the chitinase 3-like protein 1 enzyme-linked immunosorbent assay for standard points. ....                                                                                                                        | 37               |
| Table S4G Within-run precision or intra-assay variability of the chitinase 3-like protein 1 enzyme-linked immunosorbent assay for serum samples. ....                                                                                                                          | 39               |
| Table S4H Within-run precision or intra-assay variability of the chitinase 3-like protein 1 enzyme-linked immunosorbent assay for urine samples.....                                                                                                                           | 40               |
| Table S4I Assessment of the enzyme-linked immunosorbent assay linearity for urinary chitinase 3-like protein 1.....                                                                                                                                                            | 41               |
| Table S5: Sharpened clinical phenotype analysis with areas under the receiver-operating characteristics curves of urinary chitinase 3-like protein 1 and urinary neutrophil gelatinase-associated lipocalin at enrollment.....                                                 | 42               |
| Table S6: Spearman's coefficients of rank correlation for UCHI3L1 and UNGAL, both measured at enrollment, in the total analysis cohort, in subgroups separated by AKI stage at enrollment, and in subgroups separated by AKI stage within 12-h and 24-h after enrollment. .... | 43               |

|                                                                                                                                                                                                                                                                                                                                                                                                                                                                                                                                                                                                                   |           |
|-------------------------------------------------------------------------------------------------------------------------------------------------------------------------------------------------------------------------------------------------------------------------------------------------------------------------------------------------------------------------------------------------------------------------------------------------------------------------------------------------------------------------------------------------------------------------------------------------------------------|-----------|
| Table S7: Youden index with the associated criterion value of the urinary biomarker. ....                                                                                                                                                                                                                                                                                                                                                                                                                                                                                                                         | 44        |
| Table S8: Proportion of patients with a concomitant very high serum chitinase 3-like protein 1 in the groups of patients who did not develop acute kidney injury and either presented with or without an increased urinary chitinase 3-like protein 1 at enrollment. ....                                                                                                                                                                                                                                                                                                                                         | 45        |
| <b><u>SUPPLEMENTAL FIGURE LEGENDS</u></b> .....                                                                                                                                                                                                                                                                                                                                                                                                                                                                                                                                                                   | <b>46</b> |
| Figure S1 Area under the receiver-operating characteristics curve (AUC-ROC) with 95% confidence interval (CI) of (A) urinary chitinase 3-like protein 1 (UCHI3L1) and (B) urinary neutrophil gelatinase-associated lipocalin (UNGAL) at enrollment for predicting acute kidney injury (AKI) stage $\geq 2$ based on the Kidney Disease: Improving Global Outcomes (KDIGO) serum creatinine (SCr) or urine output (UO) criteria (AKI <sub>SCr/UO</sub> ) within 12-h in different subgroups of patients. ....                                                                                                      | 46        |
| Figure S2 Area under the receiver-operating characteristics curve (AUC-ROC) with 95% confidence interval (CI) of (A) urinary chitinase 3-like protein 1 (UCHI3L1) and (B) urinary neutrophil gelatinase-associated lipocalin (UNGAL) at enrollment for predicting acute kidney injury (AKI) stage $\geq 2$ based on the Kidney Disease: Improving Global Outcomes (KDIGO) serum creatinine (SCr) criteria (AKI <sub>SCr</sub> ) within 24-h in different subgroups of patients. ....                                                                                                                              | 46        |
| Figure S3 Distribution of (A) urinary chitinase 3-like protein 1 (UCHI3L1) and (B) urinary neutrophil gelatinase-associated lipocalin (UNGAL) at enrollment in the 8 selected subgroups of patients who did not develop acute kidney injury (AKI) based on the Kidney Disease: Improving Global Outcomes serum creatinine (SCr) or urine output (UO) criteria (no-AKI <sub>SCr/UO</sub> ) within 7-d after enrollment, compared to the distribution in all 12-h no-AKI <sub>SCr/UO</sub> patients, and in all those maximally reaching AKI <sub>SCr/UO</sub> stages 1, 2, or 3 within 12-h after enrollment. .... | 47        |
| Figure S4 Distribution of (A) urinary chitinase 3-like protein 1 (UCHI3L1) and (B) urinary neutrophil gelatinase-associated lipocalin (UNGAL) at enrollment in the 8 selected subgroups of patients who did not develop acute kidney injury (AKI) based on the Kidney Disease: Improving Global Outcomes serum creatinine (SCr) criteria (no-AKI <sub>SCr</sub> ) within 7-d after enrollment, compared to the distribution in all 24-h no-AKI <sub>SCr</sub> patients, and in all those maximally reaching AKI <sub>SCr</sub> stages 1, 2, or 3 within 24-h after enrollment. ....                               | 47        |

## **SUPPLEMENTAL TEXTS**

### **TEXT S1: COMPLETE METHODS**

#### **Sample collection and handling**

##### Blood (serum)

Approximately 6 ml of blood was obtained via an indwelling arterial line at each study-specific sampling moment. Blood was collected in clot activator collection tubes (Venosafe 6 ml, ref. VF-106SAS, Terumo Europe, Leuven, BE) for serum. After clotting at 4°C (in weekends: storage up to ±40-hours (h; Table S3A) at 4°C based on our stability results (Table S4D)), serum samples were centrifuged (Heraeus Labofuge 400 R, swinging bucket rotor with round bucket, Thermo Fisher Scientific, Waltham, MA) at 4°C and 1992 x g for 15-minutes (min). The supernatant was divided into 4 aliquots: 1 for chitinase 3-like protein 1 (CHI3L1), 1 for creatinine (Cr), and 2 as backup. These eppendorf tubes containing the supernatant were immediately stored at -80°C. No preservatives were added. Samples were thawed at room temperature immediately prior to analysis and vortexed before pipetting.

##### Urine

Approximately 5-10 ml of urine was obtained via an indwelling bladder catheter at each study-specific sampling moment. Urine was collected directly from the catheter (never from the collection bag) via the needle-free port-system in a standard (non-coated) transport container that can also be used as centrifuge tube for sediment recovery (Urine Monovette 10 ml, ref. 10.252, Sarstedt, Nümbrecht, DE). Urine was immediately (in weekends: storage up to ±40-h (Table S3A) at 4°C based on our stability results (Table S4D)) centrifuged (Heraeus Labofuge 400 R, swinging bucket rotor with round bucket, Thermo Fisher Scientific, Waltham, MA) at 4°C and 1029 x g for 10-min. The supernatant was divided into 5 aliquots: 1 for CHI3L1, 1 for neutrophil gelatinase-associated lipocalin (NGAL), 1 for Cr, and 2 as

backup. These eppendorf tubes containing the supernatant were immediately stored at  $-80^{\circ}\text{C}$ . No preservatives were added. Samples were thawed at room temperature immediately prior to analysis and vortexed before pipetting. Eppendorf tubes that still contained visible sediment were very shortly ( $<15$ -seconds) centrifuged (Heraeus Biofuge Fresco, Thermo Fisher Scientific, Waltham, MA) at  $4^{\circ}\text{C}$  and  $7697 \times g$  before pipetting.

## **Biomarker measurements**

### Creatinine

Creatinine concentrations were measured in the 24-h laboratory of Ghent University Hospital with a kinetic rate-blanked Jaffé assay (commercial reagents, Roche Diagnostics, Basel, CH) on a Cobas c502.

All samples were analyzed within 6-months (mo) after collection (median: 3-mo; interquartile range (IQR): 2-4 mo) complying with the reported stability: when stored without preservatives at  $-22$  respectively  $-25^{\circ}\text{C}$ , Cr was stable for 15-years (y) in urine [1], and for 25-y in serum [2].

### CHI3L1

The concentration of CHI3L1 was determined in-house by *J. De Loor, K. Demeyere, and K. Van Nuffel* with a sandwich enzyme-linked immunosorbent assay (ELISA; Human Chitinase 3-like 1 Quantikine ELISA Kit, ref. DC3L10, R&D Systems, Minneapolis, MN). The standard procedure that was followed when measuring CHI3L1 by ELISA is as follows. All samples and reagents were brought to room temperature. Samples and standards requiring dilution were accordingly prepared using calibrator diluents (1/200 or 1/500 dilution for serum; 1/5 or 1/10 dilution for urine; Table S3B). To each well pre-coated with a rat monoclonal antibody against recombinant human CHI3L1 we added 100  $\mu\text{l}$  of assay diluents followed by 50  $\mu\text{l}$  of the appropriate sample or standard. This mixture was allowed to react for 2-h at room temperature. Each well was then aspirated and washed 4 times before adding 200  $\mu\text{l}$  of a

horseradish peroxidase-conjugated goat polyclonal antibody against recombinant human CHI3L1. After another incubation time of 2-h at room temperature, each well was again aspirated and washed 4 times. We then added 200  $\mu$ l of substrate solution per well, which consisted of 100  $\mu$ l of hydrogen peroxide and 100  $\mu$ l of tetramethylbenzidine. This mixture was incubated in the dark for 30-min. Finally, 50  $\mu$ l of stop solution was added per well after which the optical density (OD) of each well was measured with a microplate reader (Multiskan MS microplate reader, Thermo Fisher Scientific, Waltham, MA) set at 450 nm. The correction wavelength was set at 550 nm. The serum and urinary CHI3L1 concentrations were calculated with a microplate analysis program (DeltaSoft JV, Biomettatics, Princeton Junction, NJ). The 4-parameter logistic (4PL) model was chosen for curve fitting, as described by the manufacturer.

All samples were analyzed within 13-mo after collection (median: 7-mo; IQR: 3-10 mo). When stored without preservatives (personal communication with Johansen, JS) at  $-80^{\circ}\text{C}$ , serum CHI3L1 (SCHI3L1) is stable for 8-y [3]. Additionally, we showed that urinary CHI3L1 (UCHI3L1) may even be measured after a second thawing step within at least 30-mo after the first freezing (Table S4E).

### NGAL

The concentration of urinary NGAL (UNGAL) was measured in the clinical chemistry laboratory of Ghent University Hospital with a particle-enhanced turbidimetric immunoassay (PETIA; NGAL Test, ref. ST001-3CA, BioPorto, Hellerup, DK) on a Modular P. The standard procedure that was followed when measuring UNGAL by PETIA is as follows. All samples and reagents were brought to room temperature. After calibrating and running the controls 150  $\mu$ l of sample was provided in a specific sample cup, as described by the manufacturer. To read over the measuring principle of this PETIA, we refer to other literature [4].

All NGAL analyses were performed in batch in November 2014. Storage at  $-80^{\circ}\text{C}$  for 2-y without preservatives has been shown not to affect UNGAL [5].

### **UO calculation**

For urine output (UO) calculations we accepted a margin of 10% under the 1-h block.

Therefore, all urine volume measurements over a period less than 0.9-h (54-min) were first counted up with the following measurement. Then, we redistributed all blocks  $\geq 1.8$ - and  $< 2.7$ -h into 2 blocks, and all blocks  $\geq 2.7$ - and  $\leq 3$ -h into 3 blocks, generating blocks of  $\geq 0.9$ - and  $< 1.8$ -h. Blocks  $> 3$ -h were considered as unreliable for redistribution and UO calculation.

### **Statistical analysis**

The primary analysis was based on comparison of the areas under the receiver-operating characteristics curves (AUC-ROC) of UCHI3L1 with those of UNGAL for predicting the defined endpoints, which was performed in MedCalc 15.2.1 (MedCalc Software, Oostende, BE). The method by DeLong et al. was selected for calculation of the standard error of both the AUC-ROC and the difference between 2 AUC-ROCs [6]. For the AUC-ROC, a binomial exact 95% confidence interval (CI) was calculated. This program also lists the Youden index [7], defined as the maximum of [sensitivity plus specificity minus 1], with its associated criterion for each AUC-ROC. We also calculated Spearman's coefficients of rank correlation with this program.

In SPSS 22 (IBM, Armonk, NY) we performed:

(a) Mixed model analysis with  $\log_{10}(\text{UCHI3L1})$  as outcome variable, diagnosis of the 1<sup>st</sup> episode of acute kidney injury (AKI) stage  $\geq 2$  based on the Kidney Disease: Improving Global Outcomes (KDIGO) serum Cr (SCr) or UO criteria ( $\text{AKI}_{\text{SCr/UO}}$ ) within 24-h after sampling as predictor variable, and patient as random factor.

(b) Unpaired comparison of a variable between 2 independent samples. Categorical variables were analyzed with Fisher's exact or the chi-square test, and continuous variables with the

nonparametric Mann-Whitney U test. The SPSS ‘Descriptives’ menu uses Method 6 from the article by Hyndman and Fan for calculation of the IQR [8]. Additionally, we calculated the 95% CI for a proportion using the Wilson procedure without a correction for continuity [9, 10].

(c) Paired comparison of a continuous variable between 2 related samples (Tables S4D and E) using the Wilcoxon matched-pair signed-rank test.

(d) Paired comparison of a continuous variable between >2 related samples using the related-samples Friedman’s two-way analysis of variance by ranks.

Box and whisker plots were generated in GraphPad Prism 5 (GraphPad Software, San Diego, CA), which also uses Method 6 for calculation of the 1<sup>st</sup> and 3<sup>rd</sup> quartile [8]. The method by Tukey was selected for drawing of the whiskers [11].

For all analyses, 2-sided P values <0.05 were considered significant.

We will now describe how the urinary biomarkers were introduced into the statistical models.

### **Review and adjustment of CHI3L1 concentrations before input in statistical programs**

**Remark:** CHI3L1 concentrations are expressed in **pg/ml** in these raw data.

#### Step 1: Evaluation of the standard curve of the ELISA

Only if the coefficient of determination ( $R^2$ )  $\geq 0.995$ , there is a good fit of the 7 standard points in the 4PL model. Additionally, we evaluated whether the assured dynamic range of the standard curve was in fact as dynamic as guaranteed (Table S3C).

#### Step 2: Re-analysis of samples with a concentration (not adjusted for dilution) outside the validated dynamic range of the curve

The details of this standard procedure are outlined in Table S3D.

#### Step 3: Adjustment of CHI3L1 concentrations of optimally diluted samples with $OD_{\text{sample}}$

$< OD_{62.5}$



Table S3E in detail outlines the standard procedure that was followed in this case. Note that, based on the acceptable recovery limits (70-130%), the back-calculated Concentration(Conc)<sub>62.5</sub> ranges from 43.8-81.3 pg/ml.

### **Adjustment of UNGAL concentrations before input in statistical programs**

In the ‘performance data and application note for Roche Modular P’

([http://ngal.com/media/30866/the\\_ngal\\_test\\_roche\\_modular\\_p\\_ivd.pdf](http://ngal.com/media/30866/the_ngal_test_roche_modular_p_ivd.pdf)) can be read that the limit of quantification (LOQ) of the NGAL Test was determined to be 25 ng/ml on this analyzer model. As the limit of detection (LOD) was not tested on this model we were advised (personal communication with BioPorto) to use the LOQ that was estimated on the Roche Hitachi 917 ([http://ngal.com/media/30857/the\\_ngal\\_test\\_roche\\_hitachi\\_917\\_ivd.pdf](http://ngal.com/media/30857/the_ngal_test_roche_hitachi_917_ivd.pdf)), which was 12 ng/ml. The measured UNGAL concentrations were adjusted based on these reported limits (Table S3F).

## **TEXT S2: ADDITIONAL ANALYSES**

### **METHODS**

#### **Subgroup analyses**

We evaluated the biomarkers' diagnostic performances for predicting the primary endpoint as well as the 24-h AKI<sub>SCr</sub> secondary endpoint in subgroups of patients. The selected variables used for grouping were: age, baseline estimated GFR (eGFR) calculated with the Chronic Kidney Disease Epidemiology Collaboration (CKD-EPI) formula, reason for ICU admission, patient's location prior to ICU admission, Sepsis-related Organ Failure Assessment (SOFA) score at d1, and presence of suspected bacterial infection, either leading to arterial hypotension or organ dysfunction, or leading to shock (Table S4A), at d1.

Additionally, we used the same grouping variables in both patients who did not develop AKI<sub>SCr/UO</sub> within 7-d after enrollment and those who did not develop AKI<sub>SCr</sub> within 7-d after enrollment. The distribution of UCHI3L1 and UNGAL at enrollment in selected subgroups of 7-d no-AKI<sub>SCr/UO</sub> patients was plotted against the distribution in all 12-h no-AKI<sub>SCr/UO</sub> patients and in all those maximally reaching AKI<sub>SCr/UO</sub> stages 1, 2, or 3 within 12-h after enrollment. Likewise, the distribution of these biomarkers at enrollment in selected subgroups of 7-d no-AKI<sub>SCr</sub> patients was plotted against the distribution in all 24-h no-AKI<sub>SCr</sub> patients and in all those maximally reaching AKI<sub>SCr</sub> stages 1, 2, or 3 within 24-h after enrollment.

#### **Additional AUC-ROC analyses**

Additional endpoints of the study were: AKI<sub>SCr/UO</sub> stage  $\geq 1$  within 12-h and 24-h after enrollment; AKI<sub>SCr</sub> stage  $\geq 1$  within 12-h and 24-h after enrollment. As these endpoints include AKI stage 1, we additionally excluded the patients with AKI stage 1 at enrollment from the analysis cohort (n=181). The number of patients in the resulting sub-cohorts was 158 (AKI<sub>SCr/UO</sub>) and 160 (AKI<sub>SCr</sub>).

## **Validation of the analytical stability of CHI3L1**

### Short-term stability of CHI3L1 in serum and urine before centrifugation

Høgdall et al. found no change in the CHI3L1 concentration when serum samples were left on the clot at 4°C for 24-h before centrifugation, however, after 72-h SCHI3L1 was significantly increased [12]. We further tested the stability of CHI3L1 in serum (n=2) and also in urine (n=4) of intensive care unit (ICU) patients when stored at 4°C for 6-h (urine), 24-h, and 48-h before centrifugation by comparing these concentrations with those of the immediately centrifuged samples and calculating the mean coefficient of variation (CV).

### Combined long-term and freeze-thaw stability of CHI3L1 in urine

As mentioned above, SCHI3L1 is stable for 8-y when stored at -80°C without preservatives.

Høgdall et al. additionally showed that repetitive freezing and thawing of serum samples up to 8 times does not influence the concentration of SCHI3L1 [12].

For our study the most relevant stability feature concerning UCHI3L1 was whether UCHI3L1 measured in an aliquot that was thawed for the first time stayed stable after refreezing followed by thawing for the second time. Indeed, this was the protocol when UCHI3L1 fell outside the range of the standard curve at the first measurement. To evaluate this combined stability we compared those concentrations measured after the second thawing with those measured after the first thawing and calculated the mean CV. Total freezing times (=time between first freezing and second thawing), specifically for this stability evaluation, ranged from 6-30 mo (n=2 for 6-mo, 12-mo, 18-mo, 24-mo, and 30-mo).

## **Partial in-house validation of the CHI3L1 ELISA**

### Within-run precision or intra-assay variability

Of the 101 ELISA runs performed for CHI3L1 measurement (with ELISA kits from 6 different lots), 31 runs had replicate analyses of at least 1 sample or standard. These replicate samples were divided into 3 (serum) or 2 (urine) groups, i.e. low, intermediate (serum), and

high, covering the analytical range of the standard curve (0.06 - 4.00 ng/ml). Note that for urine there was no intermediate group as there were no replicates available of urine samples with a UCHI3L1 concentration  $>1.0$  and  $\leq 2.5$  ng/ml. Replicate analyses of the 0.25, 0.50 and 1.00 ng/ml standards were consistently performed as these constitute the middle 3 points of the standard curve. The intra-assay between-lot CV was calculated as the weighted mean of the mean intra-assay within-lot CVs.

#### Between-run precision or inter-assay variability

Upon inquiry it appeared that the inter-assay CVs reported by the manufacturer were generated using 40 different assays that were divided between 4 technicians. Each of them performed one ELISA per day. The 40 assays consisted of 2 different matched sets of reagents, just like 2 different kit lots (Table S4B), so lot-to-lot variation was taken into account. Therefore, this part of the validation process was not repeated in-house. Three samples (type not specified) with a known CHI3L1 concentration ( $\pm 0.50$ ,  $\pm 1.00$ , and  $\pm 2.00$  ng/ml) were analyzed. The reported mean inter-assay between-lot CV was 5.3% for the  $\pm 0.50$  ng/ml sample, 5.8% for the  $\pm 1.00$  ng/ml sample, and 6.9% for the  $\pm 2.00$  ng/ml sample. The mean of these 3 CVs is 6.0%.

#### Calculation of the LOD and LOQ

The minimal detectable dose or LOD was determined by adding 2.6 [13] standard deviations (SD) to the mean OD value of 10 replicates of the zero standard (i.e. calibrator diluents) and calculating the corresponding concentration (DeltaSoft JV, Biometalics, Princeton Junction, NJ). Likewise, the minimal quantifiable dose or LOQ was determined by adding 10 [14] SDs to the mean OD value of 10 replicates of the zero standard and calculating the corresponding concentration.

#### Linearity check for urine

The linearity of the assay was assessed by the manufacturer using samples from apparently healthy volunteers. Because our study population consisted of critically ill patients we rechecked the linearity for the specimen type urine. More specifically, we wanted to investigate 'how far undiluted' we could go as urinary components linked with severe illness may possibly interfere with the CHI3L1 measurement by ELISA. Therefore, undiluted urine was not tested and designated as unsuitable. The reference for our serial dilution experiment (1/2 - 1/4 - 1/8 - 1/16) was the 1/2 diluted sample. The relationship between the measured (not adjusted for dilution) and the expected (1/2 as reference) analyte concentration was investigated by linear regression analysis (GraphPad Prism 5, GraphPad Software, San Diego, CA).

## RESULTS

### Biomarkers' diagnostic performances in subgroups

Diagnostic performance at enrollment for prediction of AKI<sub>SCr/UO</sub> stage  $\geq 2$  within the next 12-h, could be calculated in 9 of the 12 subgroups (Additional File 2: Supplemental Figure S1). Likewise, diagnostic performance at enrollment for prediction of AKI<sub>SCr</sub> stage  $\geq 2$  within the next 24-h, could be calculated in 8 of the 12 subgroups (Additional File 3: Supplemental Figure S2). As for UCHI3L1, this biomarker showed decreased diagnostic performance - defined as an AUC-ROC < the lowest border of the 95% CI in the analysis cohort - for predicting the primary endpoint in patients either with a medical reason for ICU admission, or referred from either an emergency room, or operating room, or other hospital at ICU admission, or with a SOFA score <12 at d1 [15]. Its performance for predicting the 24-h AKI<sub>SCr</sub> secondary endpoint was decreased in patients either  $\geq 65$ -y old, or with a SOFA score  $\geq 12$  at d1. As for UNGAL, this biomarker showed decreased diagnostic performance for predicting the primary endpoint in patients either  $\geq 65$ -y old, or with a medical reason for ICU admission, or referred from the floor at ICU admission. In the latter 2 subgroups UNGAL could not predict the primary endpoint. Its performance for predicting the 24-h AKI<sub>SCr</sub> secondary endpoint was decreased in patients  $\geq 65$ -y old.

We found that patients referred from the floor at ICU admission who did not develop AKI<sub>SCr/UO</sub> within 7-d after enrollment, had higher urinary biomarker concentrations at enrollment than all patients who did not develop AKI<sub>SCr/UO</sub> within 12-h after enrollment (P=0.002 for UCHI3L1 and P=0.001 for UNGAL; Additional File 4: Supplemental Figure S3). Similarly, 7-d no-AKI<sub>SCr</sub> patients who were referred from the floor at ICU admission showed higher enrollment concentrations of both urinary biomarkers than all 24-h no-AKI<sub>SCr</sub> patients (P=0.001 for both biomarkers; Additional File 5: Supplemental Figure S4).

### Additional diagnostic performances

The AUC-ROCs for predicting AKI<sub>SCr/UrO</sub> stage  $\geq 1$  within 12-h and 24-h in patients with no AKI<sub>SCr/UrO</sub> at enrollment were markedly decreased for both UCHI3L1 and UNGAL (Table S4C). Likewise, the AUC-ROCs for predicting AKI<sub>SCr</sub> stage  $\geq 1$  within 12-h and 24-h in patients with no AKI<sub>SCr</sub> at enrollment were markedly decreased as well (Table S4C). This can be explained by less renal stress or damage in patients with AKI stage 1.

### **Stability of CHI3L1 in serum and urine**

Storage at 4°C up to 48-h before centrifugation had no effect on the CHI3L1 concentration in both serum and urine ( $P \geq 0.05$ ), with a mean CV ranging from 3.8 to 3.9% for serum and from 5.0 to 8.5% for urine (Table S4D).

Refreezing at -80°C followed by a second thawing step had no effect on the CHI3L1 concentration in urine ( $P \geq 0.05$ ), even when the time between initial freezing and second thawing was 30-mo, with a mean CV ranging from 0.7 to 18.8% (Table S4E).

### **Partial in-house validation of the CHI3L1 ELISA**

For the human CHI3L1 standards 0.25, 0.50 and 1.00 ng/ml of the ELISA, the intra-assay between-lot CV was 2.9% for the 0.25 ng/ml standard, 4.4% for the 0.50 ng/ml standard, and 5.0% for the 1.00 ng/ml standard (Table S4F). Serum samples with a low or a high CHI3L1 concentration showed an excellent intra-assay between-lot CV of 2.6% for the low and 3.2% for the high concentrations (Table S4G). For urine samples with a low CHI3L1 concentration an intra-assay between-lot CV of 4.1% was calculated (Table S4H). A mean intra-assay within-lot CV of 6.7% was obtained for serum samples with an intermediate CHI3L1 concentration. Likewise, a mean intra-assay within-lot CV of 1.9% was obtained for urine samples with a high CHI3L1 concentration.

The LOD was determined as 0.02 ng/ml, the LOQ as 0.06 ng/ml.

For all 3 serial dilution experiments, each being performed with another urine sample, the 95% CI of the slope of the linear regression equation included 1, indicating 100% recovery (Table S4I). The corresponding  $R^2$  was systematically  $\geq 0.99$ .



---

## **CONCLUSIONS REGARDING THE VALIDATION OF THE ANALYTICAL STABILITY OF CHI3L1 AND THE PARTIAL IN-HOUSE VALIDATION OF THE CHI3L1 ELISA**

As an important first step, we showed that serum and urine may be stored for at least 48-h at 4°C before centrifugation without affecting the CHI3L1 stability, in analogy with the reported data for urinary neutrophil gelatinase-associated lipocalin [16]. Based on these results the study personnel could flexibly plan the handling of the samples, especially in weekends (Table S3A). When subsequently stored at -80°C, UCHI3L1 may even be measured after a second thawing step within at least 30-mo after the first freezing, in analogy with the reported data for SCHI3L1 [3, 12]. This information was required for our laboratory agenda, and is also relevant for biobanking purposes. Additionally, we can guarantee that our reported CHI3L1 concentrations are accurate and reproducible.

## LIST OF ABBREVIATIONS

4PL: 4-parameter logistic; AKI: acute kidney injury; AKI<sub>SCr</sub>: AKI that was diagnosed and classified by the KDIGO SCr criteria; AKI<sub>SCr/UO</sub>: AKI that was diagnosed and classified by the KDIGO SCr and UO criteria; AUC-ROC: area under the receiver-operating characteristics curve; CHI3L1: chitinase 3-like protein 1; CI: confidence interval; CKD-EPI: Chronic Kidney Disease Epidemiology Collaboration; Conc: concentration; Cr: creatinine; CV: coefficient of variation; eGFR: estimated glomerular filtration rate; ELISA: enzyme-linked immunosorbent assay; h: hour; ICU: intensive care unit; IQR: interquartile range; KDIGO: Kidney Disease: Improving Global Outcomes; LOD: limit of detection; LOQ: limit of quantification; min: minute; mo: month; NGAL: neutrophil gelatinase-associated lipocalin; OD: optical density; PETIA: particle-enhanced turbidimetric immunoassay; R<sup>2</sup>: coefficient of determination; SCHI3L1: serum CHI3L1; SCr: serum Cr; SD: standard deviation; SOFA: Sepsis-related Organ Failure Assessment; UCHI3L1: urinary CHI3L1; UNGAL: urinary NGAL; UO: urine output; y: year.

## SUPPLEMENTAL REFERENCES

1. Remer T, Montenegro-Bethancourt G, Shi LJ: **Long-term urine biobanking: Storage stability of clinical chemical parameters under moderate freezing conditions without use of preservatives.** *Clin Biochem* 2014, **47**:307-311.
2. Gislefoss RE, Grimsrud TK, Morkrid L: **Long-term stability of serum components in the Janus Serum Bank.** *Scand J Clin Lab Invest* 2008, **68**:402-409.
3. Johansen JS, Jensen BV, Roslind A, Nielsen D, Price PA: **Serum YKL-40, a new prognostic biomarker in cancer patients?** *Cancer Epidemiol Biomarkers Prev* 2006, **15**:194-202.
4. Lippi G, Aloe R, Storelli A, Cervellin G, Trenti T: **Evaluation of NGAL Test (TM), a fully-automated neutrophil gelatinase-associated lipocalin (NGAL) immunoassay on Beckman Coulter AU 5822.** *Clin Chem Lab Med* 2012, **50**:1581-1584.
5. Parikh CR, Coca SG, Thiessen-Philbrook H, Shlipak MG, Koyner JL, Wang Z, Edelstein CL, Devarajan P, Patel UD, Zappitelli M *et al*: **Postoperative Biomarkers Predict Acute Kidney Injury and Poor Outcomes after Adult Cardiac Surgery.** *J Am Soc Nephrol* 2011, **22**:1748-1757.
6. DeLong ER, DeLong DM, Clarkepearson DI: **Comparing the Areas under 2 or More Correlated Receiver Operating Characteristic Curves - a Nonparametric Approach.** *Biometrics* 1988, **44**:837-845.
7. Youden WJ: **Index for rating diagnostic tests.** *Cancer* 1950, **3**:32-35.
8. Hyndman RJ, Fan YN: **Sample quantiles in statistical packages.** *Am Stat* 1996, **50**:361-365.
9. Wilson EB: **Probable Inference, the Law of Succession, and Statistical Inference.** *J Am Stat Assoc* 1927, **22**:209-212.
10. Newcombe RG: **Two-sided confidence intervals for the single proportion: Comparison of seven methods.** *Stat Med* 1998, **17**:857-872.
11. Tukey JW: **Exploratory data analysis.** Reading (MA): Addison-Wesley; 1977.
12. Hogdall EVS, Johansen JS, Kjaer SK, Price PA, Blaakjaer J, Hogdall CK: **Stability of YKL-40 concentration in blood samples.** *Scand J Clin Lab Invest* 2000, **60**:247-251.
13. Büttner J, Borth R, Boutwell JH, Broughton PMG, Bowyer RC: **Approved Recommendation (1978) on Quality-Control in Clinical-Chemistry. Part 2. Assessment of Analytical Methods for Routine Use.** *Clin Chim Acta* 1979, **98**:F145-F162.

14. Raila J, Forterre S, Kohn B, Brunnberg L, Schweigert FJ: **Effects of chronic renal disease on the transport of vitamin A in plasma and urine of dogs.** *Am J Vet Res* 2003, **64**:874-879.
15. Vincent JL, Moreno R, Takala J, Willatts S, De Mendonca A, Bruining H, Reinhart CK, Suter PM, Thijs LG: **The SOFA (Sepsis-related Organ Failure Assessment) score to describe organ dysfunction/failure. On behalf of the Working Group on Sepsis-Related Problems of the European Society of Intensive Care Medicine.** *Intensive Care Med* 1996, **22**:707-710.
16. Pedersen KR, Ravn HB, Hjortdal VE, Norregaard R, Povlsen JV: **Neutrophil Gelatinase-Associated Lipocalin (NGAL): Validation of commercially available ELISA.** *Scand J Clin Lab Invest* 2010, **70**:374-382.

**SUPPLEMENTAL TABLES****Table S1** Kidney Disease: Improving Global Outcomes definition and classification of acute kidney injury.<sup>a</sup>

| SCr increase to $\geq 1.5$ times baseline, which is known or presumed to have occurred within the prior 7-d |                                               |                                                    |
|-------------------------------------------------------------------------------------------------------------|-----------------------------------------------|----------------------------------------------------|
| <b>KDIGO AKI definition</b>                                                                                 |                                               |                                                    |
|                                                                                                             | SCr increase by $\geq 0.3$ mg/dl within 48-h  |                                                    |
|                                                                                                             | UO $< 0.5$ ml/kg/h for $\geq 6$ consecutive h |                                                    |
|                            |                                               |                                                    |
| <b>KDIGO AKI stage<sup>b</sup></b>                                                                          | <b>SCr</b>                                    | <b>UO</b>                                          |
| <b>1</b>                                                                                                    | 1a.<br>Increase to $\geq 1.5$ times baseline  | 1c.<br>$< 0.5$ ml/kg/h for $\geq 6$ consecutive h  |
|                                                                                                             | 1b.<br>Increase by $\geq 0.3$ mg/dl           |                                                    |
| <b>2</b>                                                                                                    | 2a.<br>Increase to $\geq 2$ times baseline    | 2b.<br>$< 0.5$ ml/kg/h for $\geq 12$ consecutive h |
|                                                                                                             | 3a.<br>Increase to $\geq 3$ times baseline    | 3d.<br>$< 0.3$ ml/kg/h for $\geq 24$ consecutive h |
| <b>3</b>                                                                                                    | 3b.<br>Increase to $\geq 4$ mg/dl             | 3e.<br>Anuria for $\geq 12$ consecutive h          |
|                                                                                                             | 3c.<br>Initiation of RRT                      |                                                    |

AKI: acute kidney injury; KDIGO: Kidney Disease: Improving Global Outcomes; RRT: renal replacement therapy; SCr: serum creatinine; UO: urine output.

<sup>a</sup>Kidney Disease: Improving Global Outcomes (KDIGO) Acute Kidney Injury Work Group: **KDIGO Clinical Practice Guideline for Acute Kidney Injury**. *Kidney Int Suppl* 2012, 2:1-138.

<sup>b</sup>For staging purposes, patients should be staged according to the criterion or criteria that give(s) them the highest stage.

**Table S2** STrengthening the Reporting of OBservational studies in Epidemiology statement - checklist of items that should be included in the reports of cohort studies.<sup>a</sup>

|                              | Item No.       | STROBE recommendation                                                                                                                                                                | Fulfilled?                          |
|------------------------------|----------------|--------------------------------------------------------------------------------------------------------------------------------------------------------------------------------------|-------------------------------------|
| <b>Title and abstract</b>    | 1              | (a) Indicate the study's design with a commonly used term in the title or the abstract                                                                                               | <input checked="" type="checkbox"/> |
|                              |                | (b) Provide in the abstract an informative and balanced summary of what was done and what was found                                                                                  | <input checked="" type="checkbox"/> |
| <b>Introduction</b>          |                |                                                                                                                                                                                      |                                     |
| Background/rationale         | 2              | Explain the scientific background and rationale for the investigation being reported                                                                                                 | <input checked="" type="checkbox"/> |
| Objectives                   | 3              | State specific objectives, including any pre-specified hypotheses                                                                                                                    | <input checked="" type="checkbox"/> |
| <b>Methods</b>               |                |                                                                                                                                                                                      |                                     |
| Study design                 | 4              | Present key elements of study design early in the paper                                                                                                                              | <input checked="" type="checkbox"/> |
| Setting                      | 5              | Describe the setting, locations, and relevant dates, including periods of recruitment, exposure, follow-up, and data collection                                                      | <input checked="" type="checkbox"/> |
| Participants                 | 6              | (a) Give the eligibility criteria, and the sources and methods of selection of participants. Describe methods of follow-up                                                           | <input checked="" type="checkbox"/> |
|                              |                | (b) For matched studies, give matching criteria and number of exposed and unexposed                                                                                                  | NA                                  |
| Variables                    | 7              | Clearly define all outcomes, exposures, predictors, potential confounders, and effect modifiers. Give diagnostic criteria, if applicable                                             | <input checked="" type="checkbox"/> |
| Data sources/<br>measurement | 8 <sup>b</sup> | For each variable of interest, give sources of data and details of methods of assessment (measurement). Describe comparability of assessment methods if there is more than one group | <input checked="" type="checkbox"/> |
| Bias                         | 9              | Describe any efforts to address potential sources of bias                                                                                                                            | <input checked="" type="checkbox"/> |
| Study size                   | 10             | Explain how the study size was arrived at                                                                                                                                            | <input checked="" type="checkbox"/> |
| Quantitative variables       | 11             | Explain how quantitative variables were handled in the analyses. If applicable, describe which groupings were chosen and why                                                         | <input checked="" type="checkbox"/> |
|                              |                | (a) Describe all statistical methods, including those used to control for confounding                                                                                                | <input checked="" type="checkbox"/> |
| Statistical methods          | 12             | (b) Describe any methods used to examine subgroups and interactions                                                                                                                  | <input checked="" type="checkbox"/> |
|                              |                | (c) Explain how missing data were addressed                                                                                                                                          | NA                                  |
|                              |                | (d) If applicable, explain how loss to follow-up was addressed                                                                                                                       | NA                                  |

|                          | <b>Item No.</b> | <b>STROBE recommendation</b>                                                                                                                                                                                                                                                                                                                                                                                    | <b>Fulfilled?</b>                                                                                                 |
|--------------------------|-----------------|-----------------------------------------------------------------------------------------------------------------------------------------------------------------------------------------------------------------------------------------------------------------------------------------------------------------------------------------------------------------------------------------------------------------|-------------------------------------------------------------------------------------------------------------------|
|                          |                 | (e) Describe any sensitivity analyses                                                                                                                                                                                                                                                                                                                                                                           | NA                                                                                                                |
| <b>Results</b>           |                 |                                                                                                                                                                                                                                                                                                                                                                                                                 |                                                                                                                   |
| Participants             | 13 <sup>b</sup> | (a) Report numbers of individuals at each stage of study - e.g., numbers potentially eligible, examined for eligibility, confirmed eligible, included in the study, completing follow-up, and analyzed<br>(b) Give reasons for non-participation at each stage<br>(c) Consider use of a flow diagram                                                                                                            | <input checked="" type="checkbox"/><br><input checked="" type="checkbox"/><br><input checked="" type="checkbox"/> |
| Descriptive data         | 14 <sup>b</sup> | (a) Give characteristics of study participants (e.g., demographic, clinical, social) and information on exposures and potential confounders<br>(b) Indicate number of participants with missing data for each variable of interest<br>(c) Summarize follow-up time (e.g., average and total amount)                                                                                                             | <input checked="" type="checkbox"/><br>NA<br><input checked="" type="checkbox"/>                                  |
| Outcome data             | 15 <sup>b</sup> | Report numbers of outcome events or summary measures over time                                                                                                                                                                                                                                                                                                                                                  | <input checked="" type="checkbox"/>                                                                               |
| Main results             | 16              | (a) Give unadjusted estimates and, if applicable, confounder-adjusted estimates and their precision (e.g., 95% confidence interval). Make clear which confounders were adjusted for and why they were included<br>(b) Report category boundaries when continuous variables were categorized<br>(c) If relevant, consider translating estimates of relative risk into absolute risk for a meaningful time period | <input checked="" type="checkbox"/><br>NA<br>NA                                                                   |
| Other analyses           | 17              | Report other analyses done - e.g., analyses of subgroups and interactions, and sensitivity analyses                                                                                                                                                                                                                                                                                                             | <input checked="" type="checkbox"/>                                                                               |
| <b>Discussion</b>        |                 |                                                                                                                                                                                                                                                                                                                                                                                                                 |                                                                                                                   |
| Key results              | 18              | Summarize key results with reference to study objectives                                                                                                                                                                                                                                                                                                                                                        | <input checked="" type="checkbox"/>                                                                               |
| Limitations              | 19              | Discuss limitations of the study, taking into account sources of potential bias or imprecision. Discuss both direction and magnitude of any potential bias                                                                                                                                                                                                                                                      | <input checked="" type="checkbox"/>                                                                               |
| Interpretation           | 20              | Give a cautious overall interpretation of results considering objectives, limitations, multiplicity of analyses, results from similar studies, and other relevant evidence                                                                                                                                                                                                                                      | <input checked="" type="checkbox"/>                                                                               |
| Generalizability         | 21              | Discuss the generalizability (external validity) of the study results                                                                                                                                                                                                                                                                                                                                           | <input checked="" type="checkbox"/>                                                                               |
| <b>Other information</b> |                 |                                                                                                                                                                                                                                                                                                                                                                                                                 |                                                                                                                   |
| Funding                  | 22              | Give the source of funding and the role of the funders for the present study and, if applicable, for the original study on which the present article                                                                                                                                                                                                                                                            | <input checked="" type="checkbox"/>                                                                               |

---

| Item<br>No. | STROBE recommendation | Fulfilled? |
|-------------|-----------------------|------------|
|-------------|-----------------------|------------|

---

is based

---

No.: number; STROBE: STrengthening the Reporting of OBservational studies in Epidemiology.

<sup>a</sup>Vandenbroucke JP, von Elm E, Altman DG, Gotzsche PC, Mulrow CD, Pocock SJ, Poole C, Schlesselman JJ, Egger M, Initiative S: **Strengthening the reporting of observational studies in epidemiology (STROBE): Explanation and elaboration.** *PLoS Med* 2007, **4**:1628-1654.

<sup>b</sup>Give information separately for exposed and unexposed groups.



**Table S3A** Two representative work schemes for sample centrifugation in weekends.

| <b>Centrifugation on</b> |                                                         |                    |                                                         |
|--------------------------|---------------------------------------------------------|--------------------|---------------------------------------------------------|
| <b>Work scheme 1</b>     |                                                         |                    |                                                         |
| <b>Sat, 10 am</b>        |                                                         | <b>Mon, 8 am</b>   |                                                         |
| <b>Sample from</b>       | <b>Time stored at 4°C (h)<br/>before centrifugation</b> | <b>Sample from</b> | <b>Time stored at 4°C (h)<br/>before centrifugation</b> |
| Fri, 6 pm                | 16                                                      | Sat, 6 pm          | 38                                                      |
| Sat, 6 am                | 4                                                       | Sun, 6 am          | 26                                                      |
|                          |                                                         | Sun, 6 pm          | 14                                                      |
|                          |                                                         | Mon, 6 am          | 2                                                       |
| <b>Work scheme 2</b>     |                                                         |                    |                                                         |
| <b>Sun, 10 am</b>        |                                                         | <b>Mon, 8 am</b>   |                                                         |
| <b>Sample from</b>       | <b>Time stored at 4°C (h)<br/>before centrifugation</b> | <b>Sample from</b> | <b>Time stored at 4°C (h)<br/>before centrifugation</b> |
| Fri, 6 pm                | 40                                                      | Sun, 6 pm          | 14                                                      |
| Sat, 6 am                | 28                                                      | Mon, 6 am          | 2                                                       |
| Sat, 6 pm                | 16                                                      |                    |                                                         |
| Sun, 6 am                | 4                                                       |                    |                                                         |

Based on our stability results (Table S4D), the responsible study coordinator had to come once a weekend: on Sat or Sun.

**Table S3B** Dilution of serum and urine samples for the initial measurement of chitinase 3-like protein 1 by enzyme-linked immunosorbent assay.

| <b>Serum<br/>CRP<br/>(mg/l)</b> | <b>Estimated dilution for<br/>serum sample</b> | <b>SCr<br/>(mg/dl)</b>                                                                                  | <b>Estimated dilution for<br/>urine sample</b> |
|---------------------------------|------------------------------------------------|---------------------------------------------------------------------------------------------------------|------------------------------------------------|
| <b>&lt; 10</b>                  | 1/200                                          | Increase to $\geq 1.5$ times baseline, which is known or presumed to have occurred within the prior 7-d | 1/5                                            |
| <b><math>\geq 10</math></b>     | 1/500                                          | Increase by $\geq 0.3$ mg/dl within 48-h                                                                | 1/10                                           |

CHI3L1: chitinase 3-like protein 1; CRP: C-reactive protein; ELISA: enzyme-linked immunosorbent assay; SCr: serum creatinine.

The dilution of a serum sample for the initial measurement of CHI3L1 by ELISA was chosen based on a patient's serum CRP, while the dilution of a urine sample for the initial measurement was chosen based on a patient's SCr.

**Table S3C** Evaluation of the assured dynamic range of the chitinase 3-like protein 1 enzyme-linked immunosorbent assay standard curve.

| <b>Expected standard conc.</b><br><b>(pg/ml)</b> | <b>Back-calculated standard conc.</b><br><b>(pg/ml)</b> | <b>Recovery</b><br><b>(%)</b> | <b>Acceptable recovery</b><br><b>(%)</b> |
|--------------------------------------------------|---------------------------------------------------------|-------------------------------|------------------------------------------|
| <b>4000</b>                                      | X                                                       | $(X/4000)*100$                | 70-130                                   |
| <b>2000</b>                                      | X                                                       | $(X/2000)*100$                | 70-130                                   |
| <b>1000</b>                                      | X                                                       | $(X/1000)*100$                | 70-130                                   |
| <b>500</b>                                       | X                                                       | $(X/500)*100$                 | 70-130                                   |
| <b>250</b>                                       | X                                                       | $(X/250)*100$                 | 70-130                                   |
| <b>125</b>                                       | X                                                       | $(X/125)*100$                 | 70-130                                   |
| <b>62.5</b>                                      | X                                                       | $(X/62.5)*100$                | 70-130                                   |

conc.: concentration.

If a standard point has an unacceptable recovery while the adjacent standard points have acceptable recoveries, this point is removed from the standard curve. The effect on the novel standard curve is then reviewed.

**Table S3D** Re-analysis of samples with a concentration (not adjusted for dilution) outside the validated dynamic range of the chitinase 3-like protein 1 enzyme-linked immunosorbent assay standard curve.

---

**Situation 1: narrowed validated dynamic range**

|                                                      |                                  |                               |
|------------------------------------------------------|----------------------------------|-------------------------------|
| $OD_{\text{sample}} > OD_{\text{validated highest}}$ | $OD_{\text{sample}} > OD_{4000}$ | Re-analyze and dilute more    |
|                                                      | $OD_{\text{sample}} < OD_{4000}$ | Re-analyze and dilute equally |
| $OD_{\text{sample}} < OD_{\text{validated lowest}}$  | $OD_{\text{sample}} > OD_{62.5}$ | Re-analyze and dilute equally |
|                                                      | $OD_{\text{sample}} < OD_{62.5}$ | Re-analyze and dilute less    |

**Situation 2: validated dynamic range of [62.5-4000]**

|                                  |          |                                                                                                                                                                              |
|----------------------------------|----------|------------------------------------------------------------------------------------------------------------------------------------------------------------------------------|
| $OD_{\text{sample}} > OD_{4000}$ | Option 1 | Re-analyze and dilute more                                                                                                                                                   |
|                                  | Option 2 | Do not re-analyze and report as [back-calculated $\text{Conc}_{4000}$ ] multiplied with [dilution factor of sample] <sup>a</sup><br>Implication: most likely underestimation |
| $OD_{\text{sample}} < OD_{62.5}$ | Option 1 | If less dilution is possible: re-analyze and dilute less                                                                                                                     |
|                                  | Option 2 | If less dilution is possible: do not re-analyze and report as missing value <sup>a</sup>                                                                                     |
|                                  | Option 3 | If less dilution is not possible (sample already optimal diluted): see Step 3                                                                                                |

---

CHI3L1: chitinase 3-like protein 1; Conc: concentration; OD: optical density.

<sup>a</sup>All samples collected at enrollment were re-analyzed if needed, as CHI3L1 at enrollment is the primary dependent variable of the study.

**Table S3E** Adjustment of chitinase 3-like protein 1 concentrations of optimally diluted samples with optical density<sub>sample</sub> < optical density<sub>62.5</sub>.

|                                                                          |                                         |             |                                        |                                                                         |
|--------------------------------------------------------------------------|-----------------------------------------|-------------|----------------------------------------|-------------------------------------------------------------------------|
| Conc <sub>sample</sub><br>< LOD <sub>23.9</sub>                          | Conc <sub>sample</sub>                  | 0-23.8      | Conc <sub>sample</sub>                 |                                                                         |
|                                                                          | < back-calculated Conc <sub>62.5</sub>  | < 23.9      | < LOD <sub>23.9</sub>                  | Median between 0 and 23.9                                               |
| Conc <sub>sample</sub><br>= LOD <sub>23.9</sub>                          | Conc <sub>sample</sub>                  | 23.9        | Conc <sub>sample</sub>                 |                                                                         |
|                                                                          | < back-calculated Conc <sub>62.5</sub>  | = 23.9      | = LOD <sub>23.9</sub>                  | 23.9                                                                    |
| LOD <sub>23.9</sub><br>< Conc <sub>sample</sub><br>< LOQ <sub>64.6</sub> | Option 1                                |             |                                        |                                                                         |
|                                                                          | Conc <sub>sample</sub>                  | 23.9        | LOD <sub>23.9</sub>                    |                                                                         |
|                                                                          | < back-calculated Conc <sub>62.5</sub>  | < 24-64.4   | < Conc <sub>sample</sub>               | Median between 23.9 and 64.6                                            |
|                                                                          |                                         | < 43.8-64.5 | < back-calculated Conc <sub>62.5</sub> |                                                                         |
|                                                                          |                                         | < 64.6      | < LOQ <sub>64.6</sub>                  |                                                                         |
|                                                                          | Option 2                                |             |                                        |                                                                         |
|                                                                          | Conc <sub>sample</sub>                  | 23.9        | LOD <sub>23.9</sub>                    |                                                                         |
|                                                                          | >= back-calculated Conc <sub>62.5</sub> | < 43.8-64.5 | < back-calculated Conc <sub>62.5</sub> | Median between 23.9 and 64.6                                            |
|                                                                          |                                         | ≤ 43.8-64.5 | ≤ Conc <sub>sample</sub>               | (even if Conc <sub>sample</sub> falls within standard curve range)      |
|                                                                          |                                         | < 64.6      | < LOQ <sub>64.6</sub>                  |                                                                         |
| Conc <sub>sample</sub><br>≥ LOQ <sub>64.6</sub>                          | Option 1                                |             |                                        |                                                                         |
|                                                                          | Conc <sub>sample</sub>                  | 64.6        | LOQ <sub>64.6</sub>                    |                                                                         |
|                                                                          | < back-calculated Conc <sub>62.5</sub>  | ≤ 64.6-81.2 | ≤ Conc <sub>sample</sub>               | Median between 23.9 and 64.6                                            |
|                                                                          |                                         | < 64.7-81.3 | < back-calculated Conc <sub>62.5</sub> | (even if Conc <sub>sample</sub> equals or exceeds LOQ <sub>64.6</sub> ) |
| Option 2                                                                 |                                         |             |                                        |                                                                         |

|                                        | 64.6                  | LOQ <sub>64.6</sub>                    | Measured Conc |
|----------------------------------------|-----------------------|----------------------------------------|---------------|
| Conc <sub>sample</sub>                 | ≤ 64.6-81.3           | ≤ back-calculated Conc <sub>62.5</sub> |               |
| ≥ back-calculated Conc <sub>62.5</sub> | ≤ 64.6-X <sup>a</sup> | ≤ Conc <sub>sample</sub>               |               |

CHI3L1: chitinase 3-like protein 1; Conc: concentration; LOD: limit of detection; LOQ: limit of quantification; OD: optical density.

Note that the CHI3L1 concentrations are not yet corrected for dilution.

<sup>a</sup>X represents a concentration > 64.6 pg/ml.

**Table S3F** Adjustment of urinary neutrophil gelatinase-associated lipocalin concentrations before input in statistical programs.

| Measured UNGAL                              | Reported UNGAL (ng/ml)                                 |
|---------------------------------------------|--------------------------------------------------------|
| < LOD <sub>12</sub>                         | 0.1                                                    |
| = LOD <sub>12</sub>                         | 12.0                                                   |
| > LOD <sub>12</sub> and < LOQ <sub>25</sub> | Median (LOD <sub>12</sub> , LOQ <sub>25</sub> ) = 18.5 |
| ≥ LOQ <sub>25</sub>                         | Measured UNGAL                                         |

LOD: limit of detection; LOQ: limit of quantification; UNGAL: urinary neutrophil gelatinase-associated lipocalin.

**Table S4A** Definition of suspected bacterial infection, of arterial hypotension, of organ dysfunction, and of shock.

|                                                                                           |                                                                                     |                             |                                                |
|-------------------------------------------------------------------------------------------|-------------------------------------------------------------------------------------|-----------------------------|------------------------------------------------|
| Medication                                                                                | Antibiotic drug                                                                     | 'Yes' or 'No'               | In paper:<br>referred to<br>as<br>infection    |
| <b>Suspected bacterial infection</b>                                                      |                                                                                     | <b>If 'Yes'</b>             |                                                |
|                                                                                           |    |                             |                                                |
| Medication                                                                                | Antibiotic drug                                                                     | 'Yes'                       | In paper:<br>referred to<br>as<br>infection ++ |
| Arterial hypotension                                                                      | (a) Vasopressor support for at least 1-h                                            | 'Yes' or 'No'               |                                                |
|                                                                                           | (b) MAP < 70 mm Hg                                                                  | 'Yes' or 'No'               |                                                |
| Organ dysfunction                                                                         | (a) SCr > 2.0 mg/dl                                                                 | 'Yes' or 'No'               |                                                |
|                                                                                           | (b) Serum bilirubin (total) > 2.0 mg/dl                                             | 'Yes' or 'No'               |                                                |
|                                                                                           | (c) Platelet count < 100 000/ $\mu$ l                                               | 'Yes' or 'No'               |                                                |
| <b>Suspected bacterial infection leading to arterial hypotension or organ dysfunction</b> |                                                                                     | <b>If at least 1x 'Yes'</b> |                                                |
|                                                                                           |  |                             |                                                |
| Medication                                                                                | Antibiotic drug                                                                     | 'Yes'                       |                                                |
| Shock defined as non-responsive arterial hypotension                                      | (a) Vasopressor support for at least 1-h                                            | 'Yes' or 'No'               |                                                |
|                                                                                           | (b) MAP < 65 mm Hg and vascular filling                                             | 'Yes' or 'No'               |                                                |
| <b>Suspected bacterial infection leading to shock</b>                                     |                                                                                     | <b>If at least 1x 'Yes'</b> |                                                |

MAP: mean arterial pressure; SCr: serum creatinine.



**Table S4B** Experimental setup for evaluation of between-run precision or inter-assay variability by the manufacturer.

| Technician 1                                             |                         | Technician 2             |                         | Technician 3             |                         | Technician 4             |                         |
|----------------------------------------------------------|-------------------------|--------------------------|-------------------------|--------------------------|-------------------------|--------------------------|-------------------------|
| Reagent set 1                                            | Reagent set 2           | Reagent set 1            | Reagent set 2           | Reagent set 1            | Reagent set 2           | Reagent set 1            | Reagent set 2           |
| Day 1                                                    | Day 6                   | Day 1                    | Day 6                   | Day 1                    | Day 6                   | Day 1                    | Day 6                   |
| Day 2                                                    | Day 7                   | Day 2                    | Day 7                   | Day 2                    | Day 7                   | Day 2                    | Day 7                   |
| Day 3                                                    | Day 8                   | Day 3                    | Day 8                   | Day 3                    | Day 8                   | Day 3                    | Day 8                   |
| Day 4                                                    | Day 9                   | Day 4                    | Day 9                   | Day 4                    | Day 9                   | Day 4                    | Day 9                   |
| Day 5                                                    | Day 10                  | Day 5                    | Day 10                  | Day 5                    | Day 10                  | Day 5                    | Day 10                  |
| Within-lot CV by tech 1                                  | Within-lot CV by tech 1 | Within-lot CV by tech 2  | Within-lot CV by tech 2 | Within-lot CV by tech 3  | Within-lot CV by tech 3 | Within-lot CV by tech 4  | Within-lot CV by tech 4 |
| Between-lot CV by tech 1                                 |                         | Between-lot CV by tech 2 |                         | Between-lot CV by tech 3 |                         | Between-lot CV by tech 4 |                         |
| <b>Reported by manufacturer: mean of between-lot CVs</b> |                         |                          |                         |                          |                         |                          |                         |

CV: coefficient of variation.

Day X of technician 1 is not necessarily the same as day X of technicians 2-4.

**Table S4C** Areas under the receiver-operating characteristics curves with 95% confidence interval of urinary chitinase 3-like protein 1 and urinary neutrophil gelatinase-associated lipocalin at enrollment for prediction of the additional endpoints.

| Biomarker measurement | Time window | AKI <sub>SCr/VO</sub> stage $\geq 1^a$ |                 |                         | AKI <sub>SCr</sub> stage $\geq 1^b$ |                 |                         |
|-----------------------|-------------|----------------------------------------|-----------------|-------------------------|-------------------------------------|-----------------|-------------------------|
|                       |             | AUC-ROC                                | 95% CI          | Number of positives (%) | AUC-ROC                             | 95% CI          | Number of positives (%) |
| Enrollment<br>UCHI3L1 | 12-h        | 0.614                                  | 0.534-<br>0.691 | 18 (11.4)               | 0.647                               | 0.568-<br>0.721 | 7 (4.4)                 |
|                       | 24-h        | 0.554                                  | 0.473-<br>0.633 | 36 (22.8)               | 0.603                               | 0.523-<br>0.680 | 15 (9.4)                |
| Enrollment<br>UNGAL   | 12-h        | 0.553                                  | 0.472-<br>0.632 | 18 (11.4)               | 0.503                               | 0.423-<br>0.583 | 7 (4.4)                 |
|                       | 24-h        | 0.542                                  | 0.461-<br>0.621 | 36 (22.8)               | 0.504                               | 0.424-<br>0.584 | 15 (9.4)                |

AKI: acute kidney injury; AUC-ROC: area under the receiver-operating characteristics curve; CI: confidence interval; KDIGO: Kidney Disease: Improving Global Outcomes; SCr: serum creatinine; UCHI3L1: urinary chitinase 3-like protein 1; UNGAL: urinary neutrophil gelatinase-associated lipocalin; VO: urine output.

<sup>a</sup>Based on the KDIGO SCr or VO criteria for AKI.

<sup>b</sup>Based on the KDIGO SCr criteria for AKI.

**Table S4D** Short-term stability of chitinase 3-like protein 1 in serum and urine before centrifugation.

| Time between<br> and<br><br>(h) | X-h <sup>a</sup> conc.<br>(ng/ml) | 0-h <sup>a</sup> conc.<br>(ng/ml) | Mean    | SD    | CV<br>(%) | Mean CV<br>(%) | P value <sup>b</sup> |
|---------------------------------------------------------------------------------------------------------------------------------------------------------------------------------------------------|-----------------------------------|-----------------------------------|---------|-------|-----------|----------------|----------------------|
| <b>Serum</b>                                                                                                                                                                                      |                                   |                                   |         |       |           |                |                      |
| <b>24</b>                                                                                                                                                                                         | 1035.3                            | 1060.2                            | 1047.72 | 17.62 | 1.7       | 3.8            | 0.180                |
|                                                                                                                                                                                                   | 1396.5                            | 1514.9                            | 1455.70 | 83.75 | 5.8       |                |                      |
| <b>48</b>                                                                                                                                                                                         | 978.3                             | 1060.2                            | 1019.23 | 57.91 | 5.7       | 3.9            | 0.655                |
|                                                                                                                                                                                                   | 1559.7                            | 1514.9                            | 1537.32 | 31.68 | 2.1       |                |                      |
| <b>Urine</b>                                                                                                                                                                                      |                                   |                                   |         |       |           |                |                      |
| <b>6</b>                                                                                                                                                                                          | 1050.3                            | 1035.8                            | 1043.03 | 10.30 | 1.0       | 6.3            | 0.655                |
|                                                                                                                                                                                                   | 577.4                             | 679.2                             | 628.29  | 71.99 | 11.5      |                |                      |
| <b>24</b>                                                                                                                                                                                         | 3.6                               | 3.6                               | 3.59    | 0.06  | 1.6       | 8.5            | 0.593                |
|                                                                                                                                                                                                   | 12.5                              | 15.7                              | 14.13   | 2.27  | 16.0      |                |                      |
|                                                                                                                                                                                                   | 1096.1                            | 1035.8                            | 1065.93 | 42.68 | 4.0       |                |                      |
| <b>48</b>                                                                                                                                                                                         | 571.1                             | 679.2                             | 625.17  | 76.40 | 12.2      | 5.0            | 0.715                |
|                                                                                                                                                                                                   | 3.9                               | 3.6                               | 3.77    | 0.20  | 5.2       |                |                      |
|                                                                                                                                                                                                   | 14.1                              | 15.7                              | 14.89   | 1.19  | 8.0       |                |                      |
|                                                                                                                                                                                                   | 1039.2                            | 1035.8                            | 1037.46 | 2.42  | 0.2       |                |                      |
|                                                                                                                                                                                                   | 619.0                             | 679.2                             | 649.08  | 42.59 | 6.6       |                |                      |

conc.: concentration; CV: coefficient of variation; SD: standard deviation.

<sup>a</sup>The concentration of a sample that was stored for X-h at 4°C before centrifugation is represented by X-h, while that of a sample that was centrifuged immediately after collection is represented by 0-h.

<sup>b</sup>The P values are the significance levels between samples that were immediately centrifuged and those stored for 6-, 24-, or 48-h at 4°C before centrifugation.

**Table S4E** Combined long-term and freeze-thaw stability of chitinase 3-like protein 1 in urine.

| Time between<br>1 <sup>st</sup>  and 2 <sup>nd</sup><br><br>droplet<br>(mo) | Conc.<br>2 <sup>a</sup><br>(ng/ml) | Conc.<br>1 <sup>a</sup><br>(ng/ml) | Mean  | SD   | CV<br>(% minus<br>6.0% <sup>b</sup> ) | Mean CV<br>(%) | P value <sup>c</sup> |
|-----------------------------------------------------------------------------------------------------------------------------------------------------------------------------------------------------------------------------------------------|------------------------------------|------------------------------------|-------|------|---------------------------------------|----------------|----------------------|
| 6                                                                                                                                                                                                                                             | 2.3                                | 3.0                                | 2.65  | 0.48 | 12.3                                  | 18.8           | 0.655                |
|                                                                                                                                                                                                                                               | 0.7                                | 0.4                                | 0.54  | 0.17 | 25.3                                  |                |                      |
| 12                                                                                                                                                                                                                                            | 4.2                                | 3.8                                | 4.03  | 0.30 | 1.3                                   | 0.7            | 0.180                |
|                                                                                                                                                                                                                                               | 8.6                                | 8.1                                | 8.35  | 0.37 | 0.0 <sup>d</sup>                      |                |                      |
| 18                                                                                                                                                                                                                                            | 4.3                                | 3.7                                | 3.97  | 0.43 | 4.8                                   | 3.6            | 0.655                |
|                                                                                                                                                                                                                                               | 9.5                                | 10.7                               | 10.12 | 0.85 | 2.4                                   |                |                      |
| 24                                                                                                                                                                                                                                            | 2.0                                | 1.9                                | 1.95  | 0.10 | 0.0 <sup>d</sup>                      | 11.9           | 0.655                |
|                                                                                                                                                                                                                                               | 0.6                                | 0.9                                | 0.72  | 0.21 | 23.7                                  |                |                      |
| 30                                                                                                                                                                                                                                            | 14.0                               | 11.9                               | 12.94 | 1.46 | 5.3                                   | 2.6            | 0.180                |
|                                                                                                                                                                                                                                               | 6.3                                | 5.9                                | 6.09  | 0.32 | 0.0 <sup>d</sup>                      |                |                      |

conc.: concentration; CV: coefficient of variation; SD: standard deviation.

<sup>a</sup>The concentration of a sample measured after 1<sup>st</sup> thawing of an aliquot is represented by 1, while that of a sample measured after 2<sup>nd</sup> thawing of an aliquot is represented by 2. The samples in this stability study were initially analyzed (conc. 1) after a period ranging from 1-9 mo.

<sup>b</sup>Mean inter-assay CV reported by the manufacturer = 6.0% (Table S4B).

<sup>c</sup>The P values are the significance levels between samples that were thawed for the 1<sup>st</sup> time and those thawed for the 2<sup>nd</sup> time.

<sup>d</sup>CV of (conc. 2, conc. 1) ≤ mean inter-assay CV of 6.0%.

**Table S4F** Within-run precision or intra-assay variability of the chitinase 3-like protein 1 enzyme-linked immunosorbent assay for standard points.

| Analyte concentration (ng/ml) | Standards (n) | Repetitions (n)   | Mean              | SD   | CV (%) | Between-lot CV with range of mean within-lot CV (%) |
|-------------------------------|---------------|-------------------|-------------------|------|--------|-----------------------------------------------------|
| Standard 0.3                  | 4             | 2                 | 0.25 <sup>a</sup> | 0.00 | 0.9    | 2.9 (2.6-3.9)                                       |
|                               |               |                   | 0.25 <sup>a</sup> | 0.01 | 3.2    |                                                     |
|                               |               |                   | 0.23 <sup>a</sup> | 0.01 | 3.7    |                                                     |
|                               |               |                   | 0.25 <sup>b</sup> | 0.01 | 3.9    |                                                     |
| Standard 0.5                  | 11            | 2                 | 0.49 <sup>a</sup> | 0.02 | 5.1    | 4.4 (3.5-4.6)                                       |
|                               |               |                   | 0.46 <sup>a</sup> | 0.03 | 6.9    |                                                     |
|                               |               |                   | 0.52 <sup>a</sup> | 0.01 | 2.6    |                                                     |
|                               |               |                   | 0.53 <sup>a</sup> | 0.02 | 4.2    |                                                     |
|                               |               |                   | 0.51 <sup>b</sup> | 0.02 | 3.5    |                                                     |
|                               |               |                   | 0.49 <sup>c</sup> | 0.02 | 3.9    |                                                     |
|                               |               |                   | 0.46 <sup>a</sup> | 0.03 | 6.9    |                                                     |
|                               |               |                   | 0.49 <sup>a</sup> | 0.01 | 2.6    |                                                     |
| Standard 1.0                  | 18            | 2                 | 1.01 <sup>a</sup> | 0.02 | 2.4    | 5.0 (2.4-5.8)                                       |
|                               |               |                   | 0.95 <sup>b</sup> | 0.07 | 7.5    |                                                     |
|                               |               |                   | 1.02 <sup>b</sup> | 0.00 | 0.3    |                                                     |
|                               |               |                   | 0.97 <sup>b</sup> | 0.02 | 1.9    |                                                     |
|                               |               |                   | 0.97 <sup>b</sup> | 0.03 | 2.7    |                                                     |
|                               |               |                   | 0.94 <sup>b</sup> | 0.04 | 4.2    |                                                     |
|                               |               |                   | 0.97 <sup>c</sup> | 0.04 | 3.8    |                                                     |
|                               |               |                   | 0.95 <sup>c</sup> | 0.03 | 3.1    |                                                     |
|                               | 2             | 0.94 <sup>c</sup> | 0.03              | 3.5  |        |                                                     |
|                               | 2             | 0.98 <sup>b</sup> | 0.03              | 2.8  |        |                                                     |

| Analyte concentration (ng/ml) | Standards (n) | Repetitions (n) | Mean              | SD   | CV (%) | Between-lot CV with range of mean within-lot CV (%) |
|-------------------------------|---------------|-----------------|-------------------|------|--------|-----------------------------------------------------|
|                               |               | 2               | 0.96 <sup>b</sup> | 0.10 | 10.3   |                                                     |
|                               |               | 2               | 0.97 <sup>b</sup> | 0.02 | 2.5    |                                                     |
|                               |               | 4               | 1.10 <sup>c</sup> | 0.10 | 9.2    |                                                     |
|                               |               | 2               | 0.95 <sup>c</sup> | 0.07 | 7.4    |                                                     |
|                               |               | 2               | 0.94 <sup>c</sup> | 0.07 | 7.7    |                                                     |
|                               |               | 2               | 0.93 <sup>b</sup> | 0.11 | 12.3   |                                                     |
|                               |               | 2               | 1.05 <sup>b</sup> | 0.05 | 4.7    |                                                     |
|                               |               | 2               | 0.98 <sup>b</sup> | 0.04 | 3.6    |                                                     |

CV: coefficient of variation; SD: standard deviation.

Letters in superscript indicate different lots within each group. In the 3 different groups, letter X does not necessarily represent the same lot.

**Table S4G** Within-run precision or intra-assay variability of the chitinase 3-like protein 1 enzyme-linked immunosorbent assay for serum samples.

| Analyte concentration (ng/ml) | Serum samples (n) | Repetitions (n) | Mean                    | SD          | CV (%)     | Between-lot CV with range of mean within-lot CV (%) |
|-------------------------------|-------------------|-----------------|-------------------------|-------------|------------|-----------------------------------------------------|
| <b>Low</b>                    | 5                 | 2               | 0.45 <sup>a</sup>       | 0.02        | 3.9        | 2.6 (2.1-2.8)                                       |
|                               |                   |                 | 0.86 <sup>a</sup>       | 0.01        | 1.2        |                                                     |
|                               |                   |                 | 0.73 <sup>a</sup>       | 0.01        | 1.2        |                                                     |
|                               |                   |                 | 0.69 <sup>b</sup>       | 0.01        | 2.1        |                                                     |
|                               |                   |                 | 0.95 <sup>a</sup>       | 0.05        | 4.8        |                                                     |
| <b>Intermediate &gt; 1.0</b>  | 2                 | 2               | 1.21 <sup>a</sup>       | 0.02        | 1.8        | (6.7)                                               |
|                               |                   |                 | 2.22 <sup>a</sup>       | 0.26        | 11.6       |                                                     |
| <b>High &gt; 2.5</b>          | 3                 | 2               | 3.01 <sup>a</sup>       | 0.05        | 1.7        | 3.2 (1.7-3.9)                                       |
|                               |                   |                 | 3.08 <sup>b</sup>       | 0.1         | 3.1        |                                                     |
|                               |                   |                 | <u>3.24<sup>b</sup></u> | <u>0.15</u> | <u>4.6</u> |                                                     |

CV: coefficient of variation; OD: optical density; SD: standard deviation.

Underlined results represent the mean, SD and CV of the OD value (out of dynamic range of the curve).

Letters in superscript indicate different lots within each group. In the 3 different groups, letter X does not necessarily represent the same lot.

**Table S4H** Within-run precision or intra-assay variability of the chitinase 3-like protein 1 enzyme-linked immunosorbent assay for urine samples.

| Analyte concentration (ng/ml) | Urine samples (n) | Repetitions (n) | Mean                    | SD          | CV (%)     | Between-lot CV with range of mean within-lot CV (%) |
|-------------------------------|-------------------|-----------------|-------------------------|-------------|------------|-----------------------------------------------------|
| <b>Low</b>                    | 9                 | 2               | <u>0.21<sup>a</sup></u> | <u>0.00</u> | <u>0.3</u> | 4.1 (1.6-9.3)                                       |
|                               |                   |                 | <u>0.07<sup>a</sup></u> | <u>0.00</u> | <u>2.8</u> |                                                     |
|                               |                   |                 | <u>0.17<sup>a</sup></u> | <u>0.00</u> | <u>1.7</u> |                                                     |
|                               |                   |                 | 0.18 <sup>a</sup>       | 0.00        | 0.8        |                                                     |
|                               |                   |                 | 0.20 <sup>a</sup>       | 0.01        | 3.7        |                                                     |
|                               |                   |                 | 0.20 <sup>b</sup>       | 0.03        | 14.8       |                                                     |
|                               |                   |                 | <u>0.09<sup>c</sup></u> | <u>0.00</u> | <u>1.6</u> |                                                     |
|                               |                   |                 | 0.94 <sup>a</sup>       | 0.07        | 7.0        |                                                     |
| <b>High &gt; 2.5</b>          | 2                 | 2               | 0.70 <sup>b</sup>       | 0.03        | 3.9        | (1.9)                                               |
|                               |                   |                 | 2.52 <sup>a</sup>       | 0.06        | 2.3        |                                                     |
|                               |                   |                 | <u>2.74<sup>a</sup></u> | <u>0.04</u> | <u>1.4</u> |                                                     |

CV: coefficient of variation; OD: optical density; SD: standard deviation.

Underlined results represent the mean, SD and CV of the OD value (out of dynamic range of the curve).

Letters in superscript indicate different lots within each group. In the 2 different groups, letter X does not necessarily represent the same lot.



**Table S4I** Assessment of the enzyme-linked immunosorbent assay linearity for urinary chitinase 3-like protein 1.

| Urine sample | Dilution | Expected conc. | Measured conc. | Linear regression graph                                                              | Slope (95% CI)      | R <sup>2</sup> |
|--------------|----------|----------------|----------------|--------------------------------------------------------------------------------------|---------------------|----------------|
| 1            | 1/2      | 0.953          | 0.953          | 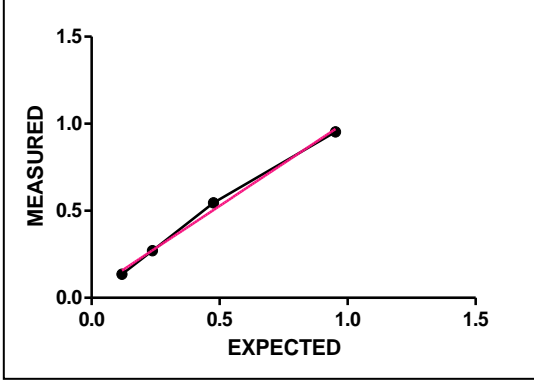   | 0.98<br>(0.75-1.21) | 0.99           |
|              | 1/4      | 0.476          | 0.545          |                                                                                      |                     |                |
|              | 1/8      | 0.238          | 0.271          |                                                                                      |                     |                |
|              | 1/16     | 0.119          | 0.136          |                                                                                      |                     |                |
| 2            | 1/2      | 2.248          | 2.248          |   | 0.94<br>(0.72-1.15) | 0.99           |
|              | 1/4      | 1.124          | 1.312          |                                                                                      |                     |                |
|              | 1/8      | 0.562          | 0.720          |                                                                                      |                     |                |
|              | 1/16     | 0.281          | 0.387          |                                                                                      |                     |                |
| 3            | 1/2      | 2.569          | 2.569          |  | 0.97<br>(0.93-1.01) | 1.00           |
|              | 1/4      | 1.284          | 1.345          |                                                                                      |                     |                |
|              | 1/8      | 0.642          | 0.719          |                                                                                      |                     |                |
|              | 1/16     | 0.321          | 0.381          |                                                                                      |                     |                |

CI: confidence interval; conc.: concentration; OD: optical density; R<sup>2</sup>: coefficient of determination.

The pink lines represent the best fitted linear regression lines.

**Table S5:** Sharpened clinical phenotype analysis with areas under the receiver-operating characteristics curves of urinary chitinase 3-like protein 1 and urinary neutrophil gelatinase-associated lipocalin at enrollment.

| Biomarker measurement | Time window | AKI <sub>SCr/VO</sub> stage $\geq 2^a$ |                 |                             | AKI <sub>SCr</sub> stage $\geq 2^b$ |                 |                             |
|-----------------------|-------------|----------------------------------------|-----------------|-----------------------------|-------------------------------------|-----------------|-----------------------------|
|                       |             | AUC-ROC                                | 95% CI          | Number of positives/total N | AUC-ROC                             | 95% CI          | Number of positives/total N |
| Enrollment<br>UCHI3L1 | 12-h        | 0.882                                  | 0.817-<br>0.930 | 2/142                       | 0.879                               | 0.817-<br>0.926 | 2/155                       |
|                       | 24-h        | 0.631                                  | 0.541-<br>0.715 | 4/126                       | 0.879                               | 0.815-<br>0.927 | 2/147                       |
| Enrollment<br>UNGAL   | 12-h        | 0.850                                  | 0.780-<br>0.904 | 2/142                       | 0.856                               | 0.791-<br>0.907 | 2/155                       |
|                       | 24-h        | 0.654                                  | 0.564-<br>0.736 | 4/126                       | 0.852                               | 0.784-<br>0.905 | 2/147                       |

AKI: acute kidney injury; AUC-ROC: area under the receiver-operating characteristics curve; CI: confidence interval; KDIGO: Kidney Disease: Improving Global Outcomes; SCr: serum creatinine; UCHI3L1: urinary chitinase 3-like protein 1; UNGAL: urinary neutrophil gelatinase-associated lipocalin; VO: urine output.

<sup>a</sup>Based on the KDIGO SCr or VO criteria for AKI.

<sup>b</sup>Based on the KDIGO SCr criteria for AKI.

**Table S6:** Spearman's coefficients of rank correlation for UCHI3L1 and UNGAL, both measured at enrollment, in the total analysis cohort, in subgroups separated by AKI stage at enrollment, and in subgroups separated by AKI stage within 12-h and 24-h after enrollment.

| Time                                 | Group                     | Spearman's coefficient of rank correlation |              | 95% CI             | Number of patients                         |              |                    |
|--------------------------------------|---------------------------|--------------------------------------------|--------------|--------------------|--------------------------------------------|--------------|--------------------|
| Enrollment                           | All                       | 0.615                                      |              | 0.515-0.698        | 181                                        |              |                    |
|                                      |                           | AKI <sub>SCr/UrO</sub> <sup>a</sup>        |              |                    | AKI <sub>SCr</sub> <sup>b</sup>            |              |                    |
| Time                                 | Subgroup                  | Spearman's coefficient of rank correlation | 95% CI       | Number of patients | Spearman's coefficient of rank correlation | 95% CI       | Number of patients |
| Enrollment                           | Stage 0 <sup>c</sup>      | 0.600                                      | 0.489-0.691  | 158                | 0.595                                      | 0.484-0.686  | 160                |
|                                      | Stage 1                   | 0.532                                      | 0.153-0.774  | 23                 | 0.575                                      | 0.191-0.807  | 21                 |
| Time window starting from enrollment | Subgroup                  | Spearman's coefficient of rank correlation | 95% CI       | Number of patients | Spearman's coefficient of rank correlation | 95% CI       | Number of patients |
| 12-h                                 | Stage 0 <sup>c</sup> or 1 | 0.601                                      | 0.497-0.688  | 175                | 0.596                                      | 0.492-0.683  | 177                |
| 24-h                                 |                           | 0.590                                      | 0.483-0.680  | 172                | 0.589                                      | 0.483-0.678  | 176                |
| 12-h                                 | Stage 2 or 3              | 0.543                                      | -0.480-0.940 | 6                  | 0.800                                      | -0.697-0.996 | 4                  |
| 24-h                                 |                           | 0.800                                      | 0.290-0.956  | 9                  | 0.900                                      | 0.086-0.993  | 5                  |

AKI: acute kidney injury; CI: confidence interval; KDIGO: Kidney Disease: Improving Global Outcomes; SCr: serum creatinine; UCHI3L1: urinary chitinase 3-like protein 1; UNGAL: urinary neutrophil gelatinase-associated lipocalin; UrO: urine output.

<sup>a</sup>Based on the KDIGO SCr or UrO criteria for AKI.

<sup>b</sup>Based on the KDIGO SCr criteria for AKI.

<sup>c</sup>No AKI

**Table S7: Youden index with the associated criterion value of the urinary biomarker.**

| Biomarker measurement | Time window | AKI <sub>SCr/VO</sub> stage $\geq 2^a$ |           |           |                     | AKI <sub>SCr</sub> stage $\geq 2^b$ |           |           |                     |
|-----------------------|-------------|----------------------------------------|-----------|-----------|---------------------|-------------------------------------|-----------|-----------|---------------------|
|                       |             | J                                      | Sens. (%) | Spec. (%) | Crit. value (ng/ml) | J                                   | Sens. (%) | Spec. (%) | Crit. value (ng/ml) |
| Enrollment            | 12-h        | 0.651                                  | 83.3      | 81.7      | > 7.6               | 0.814                               | 100.0     | 81.4      | > 7.6               |
| UCHI3L1               | 24-h        | 0.486                                  | 66.7      | 82.0      | > 7.6               | 0.818                               | 100.0     | 81.8      | > 7.6               |
| Enrollment            | 12-h        | 0.467                                  | 66.7      | 80.0      | > 139.0             | 0.802                               | 100.0     | 80.2      | > 139.0             |
| UNGAL                 | 24-h        | 0.440                                  | 66.7      | 77.3      | > 111.0             | 0.807                               | 100.0     | 80.7      | > 139.0             |

AKI: acute kidney injury; Crit.: criterion; J: Youden index defined as the maximum of [sensitivity plus specificity minus 1]; KDIGO: Kidney Disease: Improving Global Outcomes; SCr: serum creatinine; UCHI3L1: urinary chitinase 3-like protein 1; UNGAL: urinary neutrophil gelatinase-associated lipocalin; Sens.: sensitivity; Spec.: specificity; VO: urine output.

<sup>a</sup>Based on the KDIGO SCr or VO criteria for AKI.

<sup>b</sup>Based on the KDIGO SCr criteria for AKI.

**Table S8:** Proportion of patients with a concomitant very high serum chitinase 3-like protein 1 in the groups of patients who did not develop acute kidney injury and either presented with or without an increased urinary chitinase 3-like protein 1 at enrollment.

| Group                                                                       | N (%)     | Subgroup of a or b                      | N (%)    | Subgroup of c, d, e, or f   | N (%)  |
|-----------------------------------------------------------------------------|-----------|-----------------------------------------|----------|-----------------------------|--------|
| (a)<br>No AKI <sub>SCr/VO</sub> within<br>7-d after enrollment <sup>a</sup> | 95 (100)  | (c)<br>UCHI3L1 > 7.6 ng/ml <sup>b</sup> | 15 (16)  | (g)<br>SCHI3L1 > 2000 ng/ml | 6 (40) |
|                                                                             |           | (d)<br>UCHI3L1 normal                   | 80 (84)  | (h)<br>SCHI3L1 > 2000 ng/ml | 2 (3)  |
| (b)<br>No AKI <sub>SCr</sub> within<br>7-d after enrollment <sup>c</sup>    | 120 (100) | (e)<br>UCHI3L1 > 7.6 ng/ml <sup>d</sup> | 18 (15)  | (i)<br>SCHI3L1 > 2000 ng/ml | 6 (33) |
|                                                                             |           | (f)<br>UCHI3L1 normal                   | 102 (85) | (j)<br>SCHI3L1 > 2000 ng/ml | 5 (5)  |

AKI: acute kidney injury; KDIGO: Kidney Disease: Improving Global Outcomes; SCHI3L1: serum chitinase 3-like protein 1; SCr: serum creatinine; UCHI3L1: urinary chitinase 3-like protein 1; VO: urine output.

<sup>a</sup>Based on the KDIGO SCr or VO criteria for AKI.

<sup>b</sup>Criterion value of UCHI3L1 associated with the Youden index for predicting AKI<sub>SCr/VO</sub> stage  $\geq 2$  within 12-h after enrollment.

<sup>c</sup>Based on the KDIGO SCr criteria for AKI.

<sup>d</sup>Criterion value of UCHI3L1 associated with the Youden index for predicting AKI<sub>SCr</sub> stage  $\geq 2$  within 24-h after enrollment.

## **SUPPLEMENTAL FIGURE LEGENDS**

**Figure S1** Area under the receiver-operating characteristics curve (AUC-ROC) with 95% confidence interval (CI) of (A) urinary chitinase 3-like protein 1 (UCHI3L1) and (B) urinary neutrophil gelatinase-associated lipocalin (UNGAL) at enrollment for predicting acute kidney injury (AKI) stage  $\geq 2$  based on the Kidney Disease: Improving Global Outcomes (KDIGO) serum creatinine (SCr) or urine output (UO) criteria (AKI<sub>SCr/UO</sub>) within 12-h in different subgroups of patients.

The dotted vertical lines delineate the AUC-ROC with 95% CI in the analysis cohort. The total number of patients in each of the 9 subgroups (top-down) was 71, 134, 73, 108, 43, 138, 35, 146, and 122. The definition of infection ++ is outlined in Table S4A. eGFR: estimated glomerular filtration rate (calculated with the Chronic Kidney Disease Epidemiology Collaboration formula); ER: emergency room; M: medical; OH: other hospital; OR: operating room; S: surgical; SOFA: Sepsis-related Organ Failure Assessment.

Note: Additional File 2 is a TIFF file of Figure S1.

**Figure S2** Area under the receiver-operating characteristics curve (AUC-ROC) with 95% confidence interval (CI) of (A) urinary chitinase 3-like protein 1 (UCHI3L1) and (B) urinary neutrophil gelatinase-associated lipocalin (UNGAL) at enrollment for predicting acute kidney injury (AKI) stage  $\geq 2$  based on the Kidney Disease: Improving Global Outcomes (KDIGO) serum creatinine (SCr) criteria (AKI<sub>SCr</sub>) within 24-h in different subgroups of patients.

The dotted vertical lines delineate the AUC-ROC with 95% CI in the analysis cohort. The total number of patients in each of the 8 subgroups (top-down) was 71, 110, 134, 73, 43, 35, 146, and 122. The definition of infection ++ is outlined in Table S4A. eGFR: estimated glomerular filtration rate (calculated with the Chronic Kidney Disease Epidemiology Collaboration formula); S: surgical; SOFA: Sepsis-related Organ Failure Assessment.

Note: Additional File 3 is a TIFF file of Figure S2.

**Figure S3** Distribution of (A) urinary chitinase 3-like protein 1 (UCHI3L1) and (B) urinary neutrophil gelatinase-associated lipocalin (UNGAL) at enrollment in the 8 selected subgroups of patients who did not develop acute kidney injury (AKI) based on the Kidney Disease: Improving Global Outcomes serum creatinine (SCr) or urine output (UO) criteria (no-AKI<sub>SCr/UO</sub>) within 7-d after enrollment, compared to the distribution in all 12-h no-AKI<sub>SCr/UO</sub> patients, and in all those maximally reaching AKI<sub>SCr/UO</sub> stages 1, 2, or 3 within 12-h after enrollment.

The total number of patients in each group (left-right) was 33, 16, 39, 56, 16, 79, 8, 56, 140, 35, 4, and 2. The definition of infection ++ is outlined in Table S4A. eGFR: estimated glomerular filtration rate (calculated with the Chronic Kidney Disease Epidemiology Collaboration formula); ER: emergency room; OH: other hospital; OR: operating room; SOFA: Sepsis-related Organ Failure Assessment.

Note: Additional File 4 is a TIFF file of Figure S3.

**Figure S4** Distribution of (A) urinary chitinase 3-like protein 1 (UCHI3L1) and (B) urinary neutrophil gelatinase-associated lipocalin (UNGAL) at

enrollment in the 8 selected subgroups of patients who did not develop acute kidney injury (AKI) based on the Kidney Disease: Improving Global Outcomes serum creatinine (SCr) criteria (no-AKI<sub>SCr</sub>) within 7-d after enrollment, compared to the distribution in all 24-h no-AKI<sub>SCr</sub> patients, and in all those maximally reaching AKI<sub>SCr</sub> stages 1, 2, or 3 within 24-h after enrollment.

The total number of patients in each group (left-right) was 49, 28, 45, 75, 22, 98, 15, 76, 145, 31, 2, and 3. The definition of infection ++ is outlined in Table S4A. eGFR: estimated glomerular filtration rate (calculated with the Chronic Kidney Disease Epidemiology Collaboration formula); ER: emergency room; OH: other hospital; OR: operating room; SOFA: Sepsis-related Organ Failure Assessment.

Note: Additional File 5 is a TIFF file of Figure S4.
